# Supplementary material for: Transcriptomic and photosynthetic analyses of Synechocystis sp. PCC6803 and Chlorogloeopsis fritschii sp. PCC6912 exposed to an M-dwarf spectrum under an anoxic atmosphere
Source: PubMed Central journal article supplement (PMC10830646; doi:10.3389/fpls.2023.1322052), 2024-01-18
Supplement: DataSheet_1.pdf [file DataSheet_1.pdf]

## Supplementary Material

### **Transcriptomic and photosynthetic analyses of *Synechocystis* sp. PCC6803 and *Chlorogloeopsis fritschii* sp. PCC6912 exposed to an M-dwarf spectrum under an anoxic atmosphere**

**M. Battistuzzi<sup>1,2,3,\*</sup>, M. S. Morlino<sup>2</sup>, L. Cocola<sup>1</sup>, L. Trainotti<sup>2</sup>, L. Treu<sup>2</sup>, S. Campanaro<sup>2</sup>, R. Claudi<sup>4,5</sup>, L. Poletto<sup>1</sup> and N. La Rocca<sup>2,3</sup>**

<sup>1</sup> National Council of Research of Italy, Institute for Photonics and Nanotechnologies (CNR-IFN), Padua, Italy,

<sup>2</sup> Department of Biology, University of Padua, Padua, Italy,

<sup>3</sup> Center for Space Studies and Activities (CISAS), University of Padua, Padua, Italy,

<sup>4</sup> National Institute for Astrophysics, Astronomical Observatory of Padua (INAF-OAPD), Padua, Italy

<sup>5</sup> Department of Mathematics and Physics, University Roma Tre, Rome, Italy.

**\* Correspondence:**

Mariano Battistuzzi

mariano.battistuzzi@unipd.it

**Keywords: Cyanobacteria, Laboratory simulation experiments, M-dwarf spectrum, Anoxia, Transcriptomic Analysis, RNA-seq, FaRLiP.**

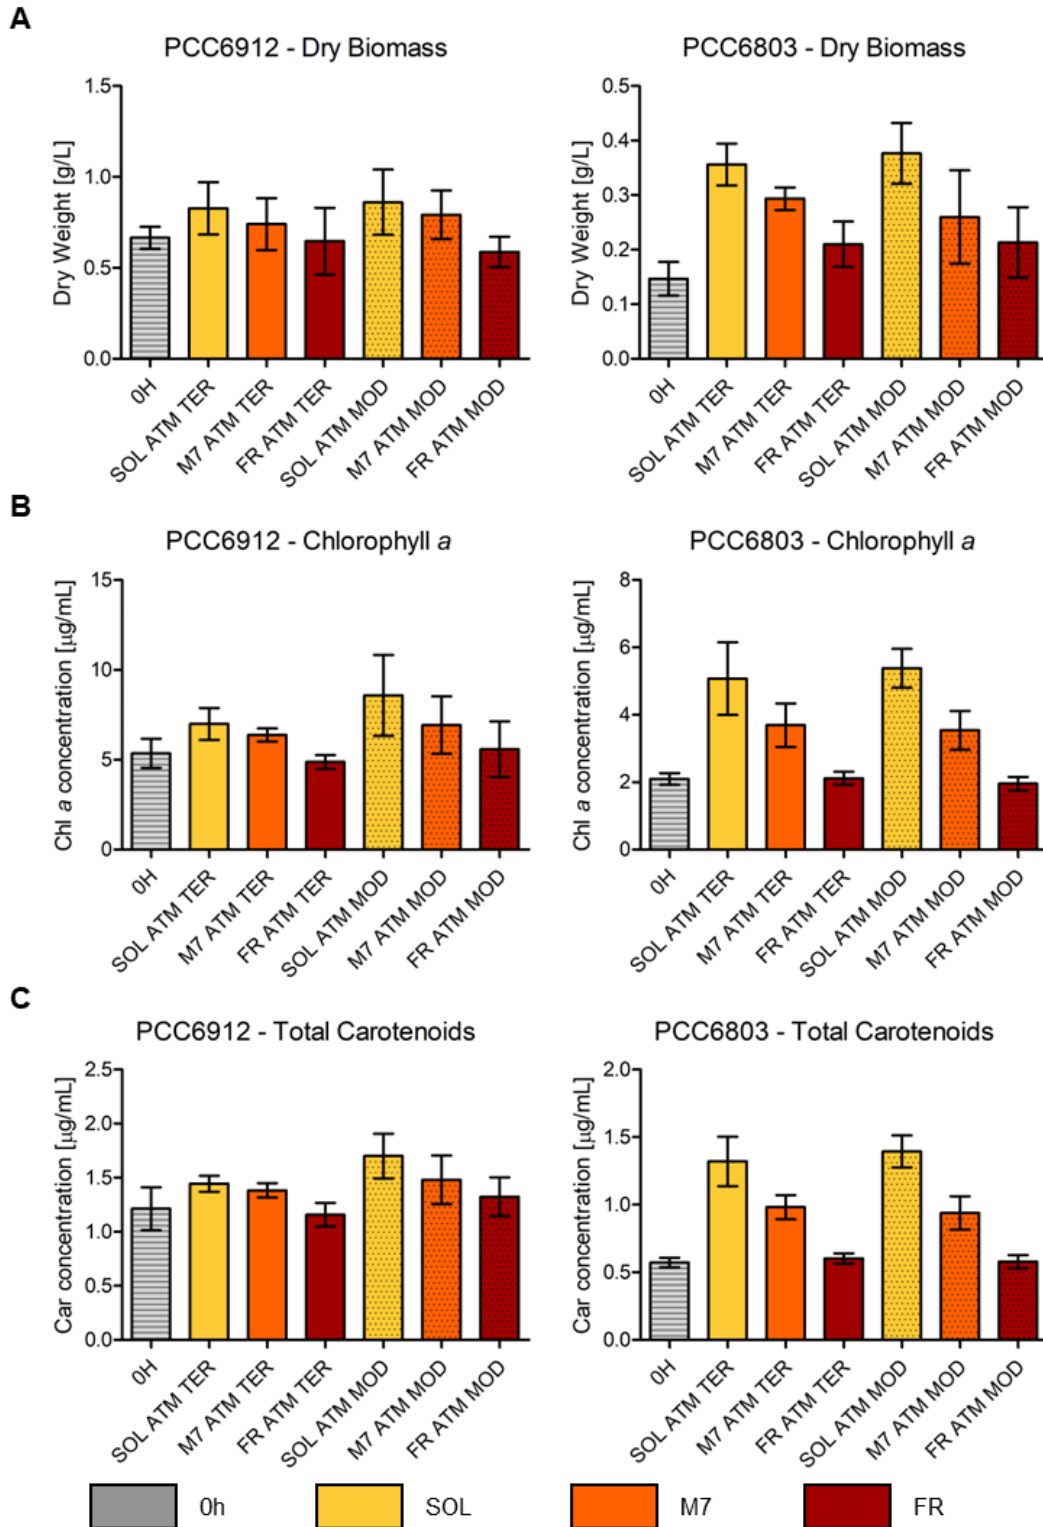

Figure S1. Dry biomass (A), Chlorophyll *a* (B) and total carotenoids (C) content of PCC6912 and PCC6803 after 48 h of exposure to the different environmental conditions. A statistical analysis of the results is provided in Table S2. SOL, Solar light; M7, M-dwarf light; FR, Far-red light; ATM TER, oxic atmosphere; ATM MOD, anoxic atmosphere.

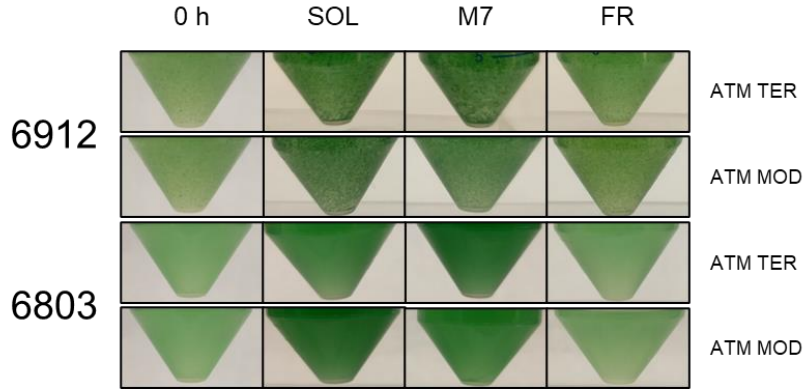

Figure S2. cultures of PCC6803 and PCC6912 at 0 and 48 h in the tested conditions. SOL, Solar light; M7, M-dwarf light; FR, Far-red light; ATM TER, oxic atmosphere; ATM MOD, anoxic atmosphere.

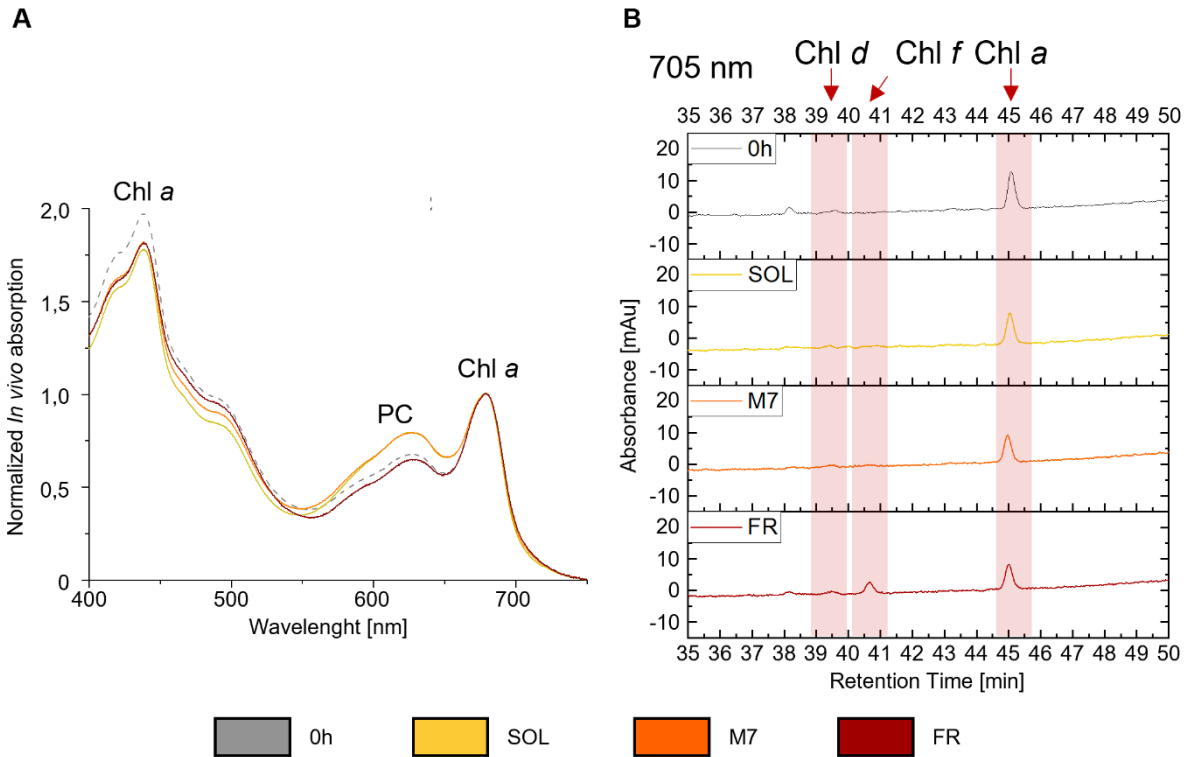

Figure S3. A) example of *In vivo* absorption spectra of PCC6912 grown for 48 h in the three light conditions tested under ATM MOD. Spectra are normalized at 680 nm; B) example HPLC chromatograms at 705 nm of PCC6912 after 48 h of exposure to the different light conditions under ATM MOD. Retention times for chlorophylls *a*, *d*, and *f* are highlighted with a red band. SOL, Solar light; M7, M-dwarf light; FR, Far-red light; ATM MOD: anoxic atmosphere.

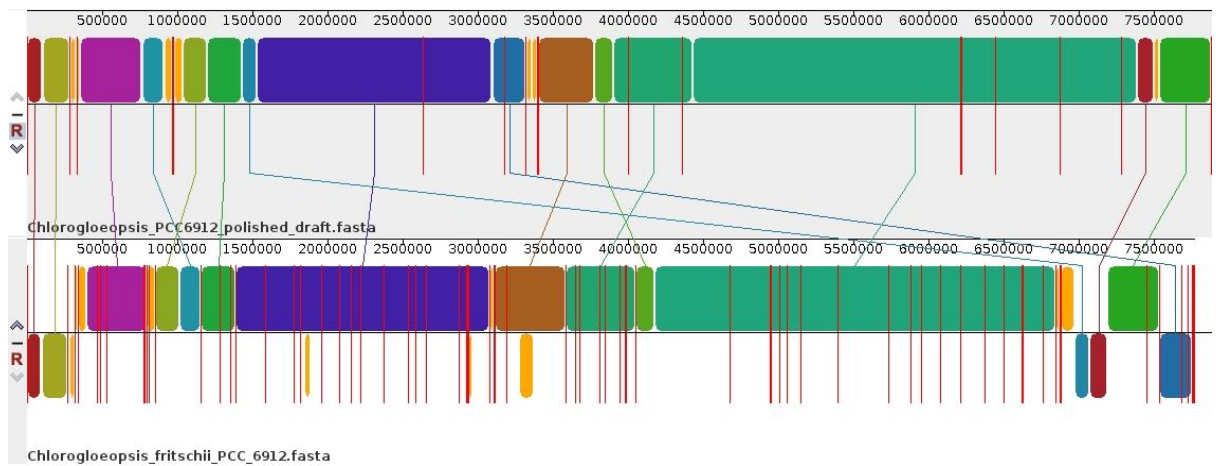

Figure S4. Mauve alignment of the PCC6912 *de novo* assembly (top) with the reference genome GCA\_003990575.1 (bottom). Red lines delimit contigs, while homologous regions are displayed with corresponding color blocks and linked by a line. Regions with the same orientation as the *de novo* assembled genome are visualized on top of the GCA\_003990575.1 track, while inverted regions are displayed at the bottom.

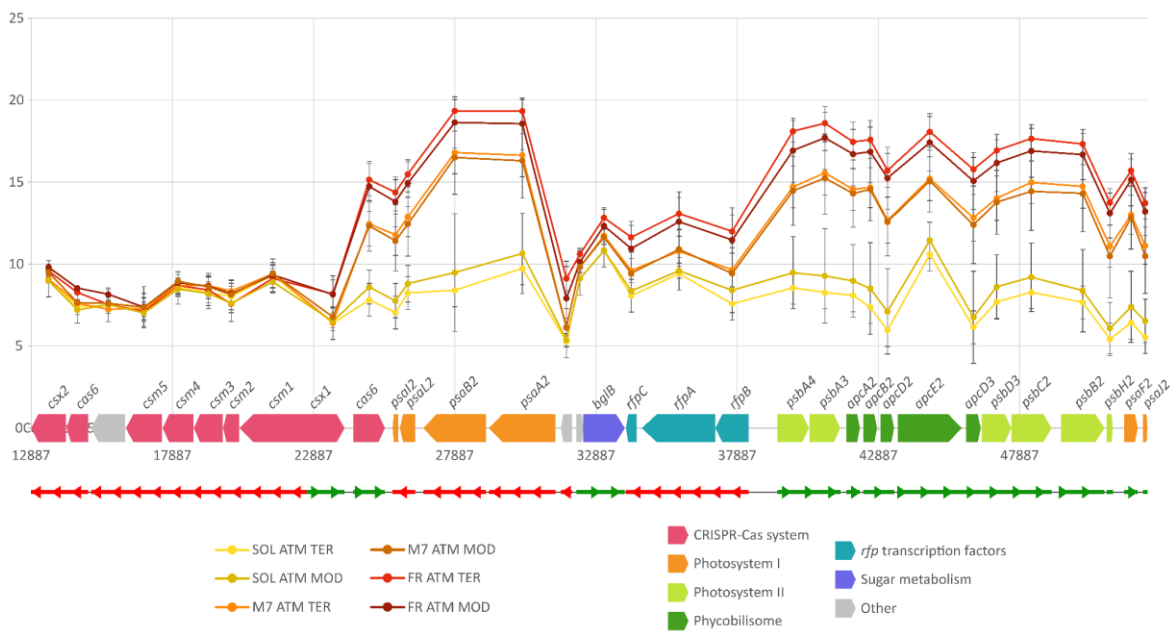

Figure S5. Gene structure of the locus coding for one CRISPR/Cas system and the neighbouring FaRLiP gene cluster. For each gene, the average VST-normalised expression in the six conditions is shown in the Y axis. Operon structure is displayed at the bottom, with sense operons in green and antisense operons in red.

Table S1. Experimental design of the study. For each experiment, 3 biological replicates were obtained.

| Experiment | Organism | Light Spectrum | Atmosphere Composition |
|------------|----------|----------------|------------------------|
| 1          | PCC6803  | M7             | ATM TER                |
| 2          | PCC6803  | SOL            | ATM TER                |
| 3          | PCC6803  | FR             | ATM TER                |
| 4          | PCC6803  | M7             | ATM MOD                |
| 5          | PCC6803  | SOL            | ATM MOD                |
| 6          | PCC6803  | FR             | ATM MOD                |
| 7          | PCC6912  | M7             | ATM TER                |
| 8          | PCC6912  | SOL            | ATM TER                |
| 9          | PCC6912  | FR             | ATM TER                |
| 10         | PCC6912  | M7             | ATM MOD                |
| 11         | PCC6912  | SOL            | ATM MOD                |
| 12         | PCC6912  | FR             | ATM MOD                |

Table S2. statistical analyses for Figure S1. (one-way ANOVA, p-value < 0,05). Significant p-values are highlighted.

|                                          | PCC6912             |                     |                     | PCC6803             |                     |                     |
|------------------------------------------|---------------------|---------------------|---------------------|---------------------|---------------------|---------------------|
|                                          | DW                  | Chl a               | Tot Car             | DW                  | Chl a               | Tot Car             |
| <b>Tukey's multiple comparisons test</b> | <b>Adj. P Value</b> | <b>Adj. P Value</b> | <b>Adj. P Value</b> | <b>Adj. P Value</b> | <b>Adj. P Value</b> | <b>Adj. P Value</b> |
| 0H vs. SOL ATM TER                       | 0,1965              | 0,1175              | 0,1136              | <0,0001             | <0,0001             | <0,0001             |
| 0H vs. M7 ATM TER                        | 0,9118              | 0,6191              | 0,4201              | <0,0001             | <0,0001             | <0,0001             |
| 0H vs. FR ATM TER                        | >0,9999             | 0,9842              | 0,9947              | 0,1558              | >0,9999             | 0,9962              |
| 0H vs. SOL ATM MOD                       | 0,0301              | <0,0001             | <0,0001             | <0,0001             | <0,0001             | <0,0001             |
| 0H vs. M7 ATM MOD                        | 0,2854              | 0,0825              | 0,0185              | 0,0008              | <0,0001             | <0,0001             |
| 0H vs. FR ATM MOD                        | 0,8523              | 0,9997              | 0,8442              | 0,3634              | 0,9981              | >0,9999             |
| SOL ATM TER vs. M7 ATM TER               | 0,9116              | 0,9768              | 0,9963              | 0,361               | 0,0012              | <0,0001             |
| SOL ATM TER vs. FR ATM TER               | 0,2322              | 0,0663              | 0,0861              | 0,0003              | <0,0001             | <0,0001             |
| SOL ATM TER vs. SOL ATM MOD              | 0,9989              | 0,3076              | 0,1653              | 0,9918              | 0,9563              | 0,8313              |
| M7 ATM TER vs. FR ATM TER                | 0,8789              | 0,3646              | 0,2905              | 0,0717              | 0,0002              | <0,0001             |
| M7 ATM TER vs. M7 ATM MOD                | 0,9871              | 0,9813              | 0,9449              | 0,8956              | 0,9989              | 0,9868              |
| FR ATM TER vs. FR ATM MOD                | 0,9801              | 0,9528              | 0,6492              | >0,9999             | 0,9984              | 0,9996              |
| SOL ATM MOD vs. M7 ATM MOD               | 0,9217              | 0,197               | 0,2434              | 0,0033              | <0,0001             | <0,0001             |
| SOL ATM MOD vs. FR ATM MOD               | 0,0023              | 0,0023              | 0,0083              | 0,0006              | <0,0001             | <0,0001             |
| M7 ATM MOD vs. FR ATM MOD                | 0,0294              | 0,4193              | 0,6421              | 0,8218              | 0,0002              | <0,0001             |

Table S3. Genome statistics of the assembly of PCC6912 used in this study, accession number JAWJEG000000000. The main metrics to assess genome quality are reported, along with completeness and contamination assessed via CheckM2, and number of detected genes.

|                                           |         |
|-------------------------------------------|---------|
| <b>Number of contigs</b>                  | 23      |
| <b>Length</b>                             | 7.89 Mb |
| <b>N50</b>                                | 640 kbp |
| <b>GC%</b>                                | 41.53   |
| <b>Median depth of coverage</b>           | 123     |
| <b>CheckM2 completeness</b>               | 100     |
| <b>CheckM2 contamination</b>              | 0.74    |
| <b>Total genes</b>                        | 6823    |
| <b>Liftoff genes from GCA_003990575.1</b> | 6760    |
| <b>De novo genes</b>                      | 63      |

Table S4. Calculation of the Average Nucleotide Identity (ANI) with dREP.

| Reference       | Reference length | Reference #contigs | Reference N50 | Query           | Query length | Query #contigs | Query N50 | Alignment length | Reference coverage | ANI     |
|-----------------|------------------|--------------------|---------------|-----------------|--------------|----------------|-----------|------------------|--------------------|---------|
| GCA_003990575.1 | 7.77 Mbp         | 85                 | 165 kbp       | PCC6912 de novo | 7.89 Mbp     | 23             | 640 kbp   | 7.782.379        | 1.002              | 99.97 % |
